# Supplementary material for: Co-circulation and misdiagnosis led to underestimation of the 2015–2017 Zika epidemic in the Americas
Source: PubMed Central journal article supplement (PMC7951986; doi:10.1371/journal.pntd.0009208), 2021-03-01

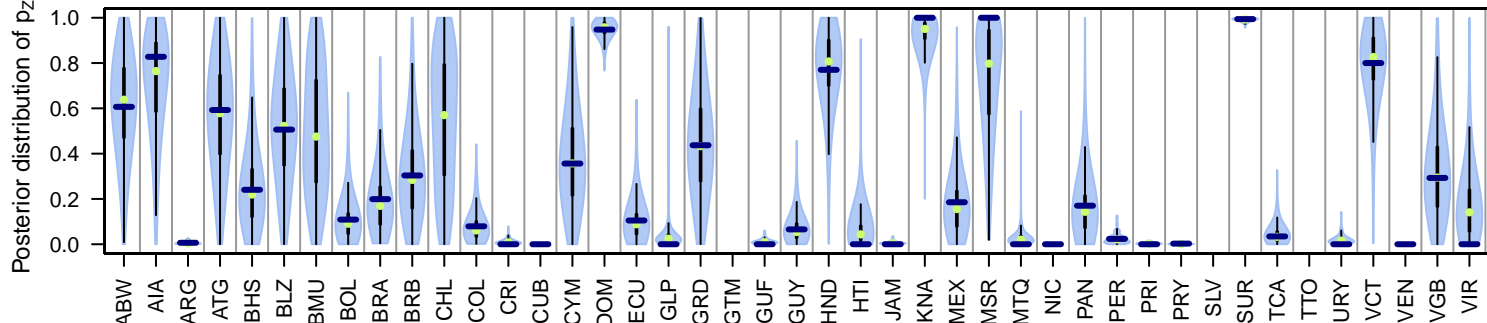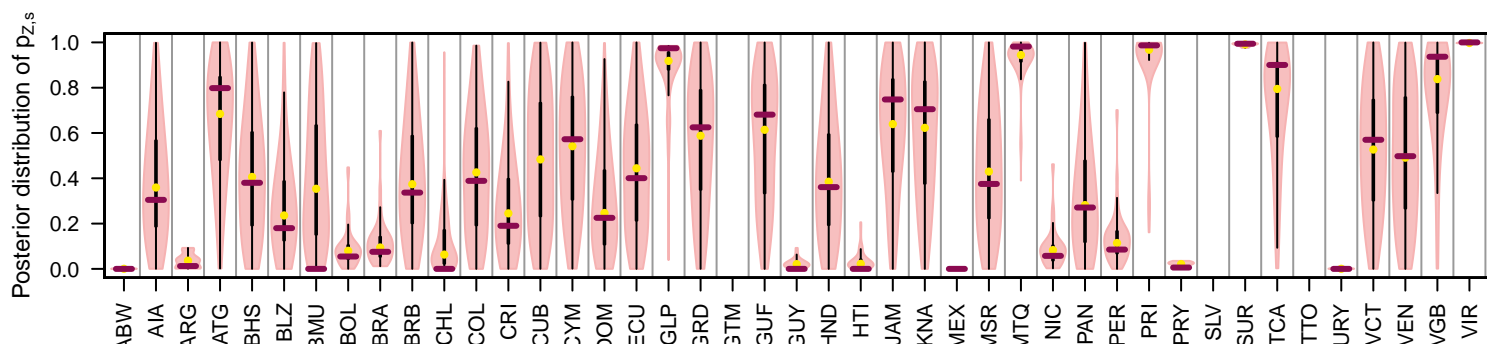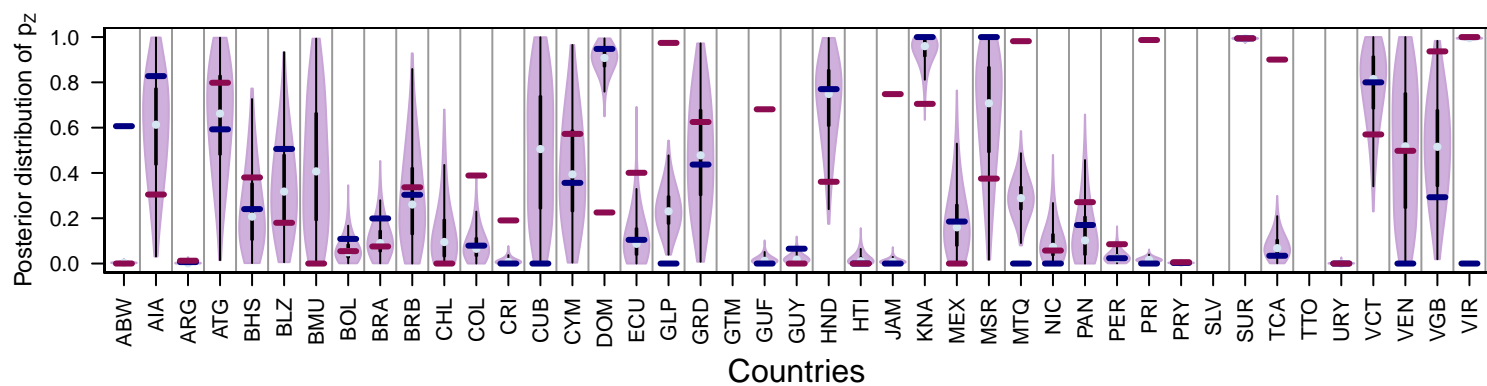

Supplement: pntd.0009208.s011.pdf [file pntd.0009208.s011.pdf]
